# Supplementary material for: Construction of Fe6, Fe8 and Mn8 metallamacrocyclic complexes and magnetic properties
Source: Royal Society of Chemistry journal article supplement (doi:10.1039/c5ra18219k), 2015-01-01
Supplement: c5ra18219k1.pdf [file c5ra18219k1.pdf]

## **Construction of Fe<sub>6</sub>, Fe<sub>8</sub> and Mn<sub>8</sub> Metallamacrocyclic Complexes and Magnetic Properties**

Huijun Li,<sup>a</sup> Yuan Wang,<sup>a</sup> Hongxin Cai,<sup>a</sup> Zhouqing Xu <sup>\*a</sup>, Lei Jia<sup>\*a</sup> and Hongwei

Hou<sup>\*b</sup>

<sup>a</sup> Department of Physics and Chemistry, Henan Polytechnic University Jiaozuo,  
454000, P. R. China

<sup>b</sup> the Colloge of Chemistry and Molecular Engineering, Zhengzhou University,  
Zhengzhou, Henan, 450052, P. R. China

a\* To whom correspondence should be addressed. Fax: (86) 0391-3987811;

E-mail: [zhqxu@pu.edu.cn](mailto:zhqxu@pu.edu.cn)

b\* To whom correspondence should be addressed. Fax: (86) 0371-67761744;

E-mail: [houghongw@zzu.edu.cn](mailto:houghongw@zzu.edu.cn).

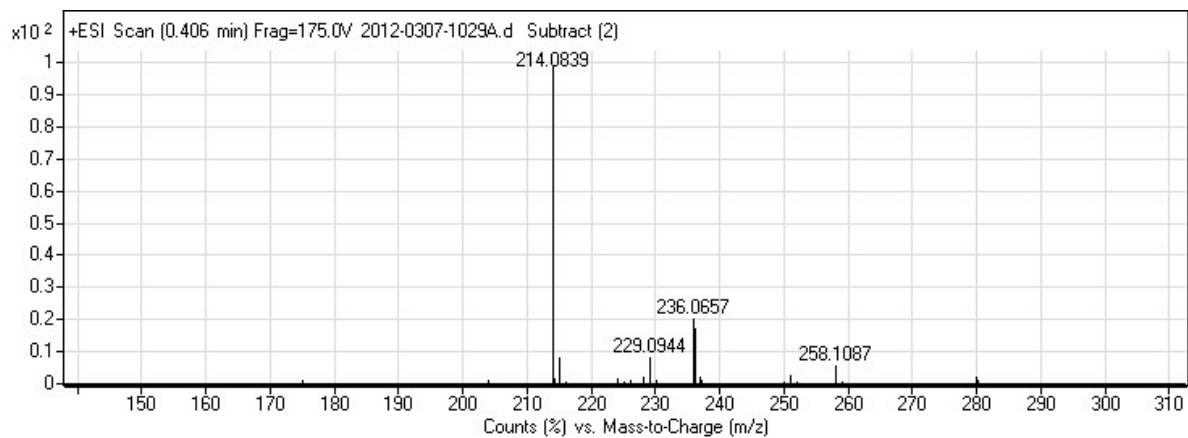

**Figure S1:** The MS spectra of H<sub>2</sub>L.

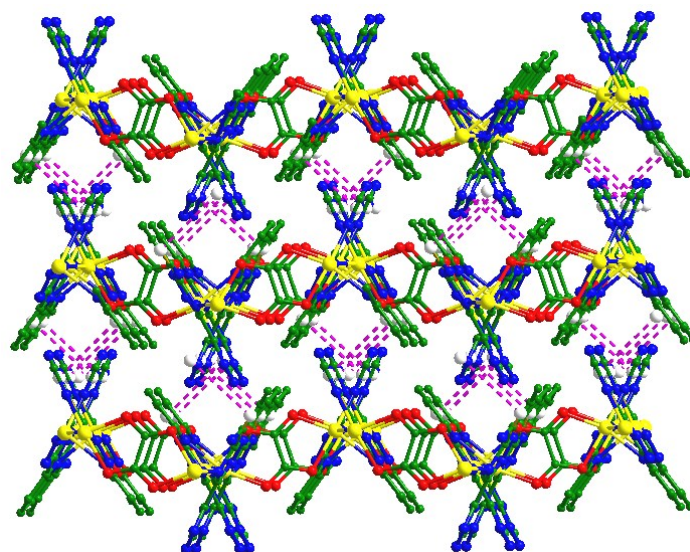

a

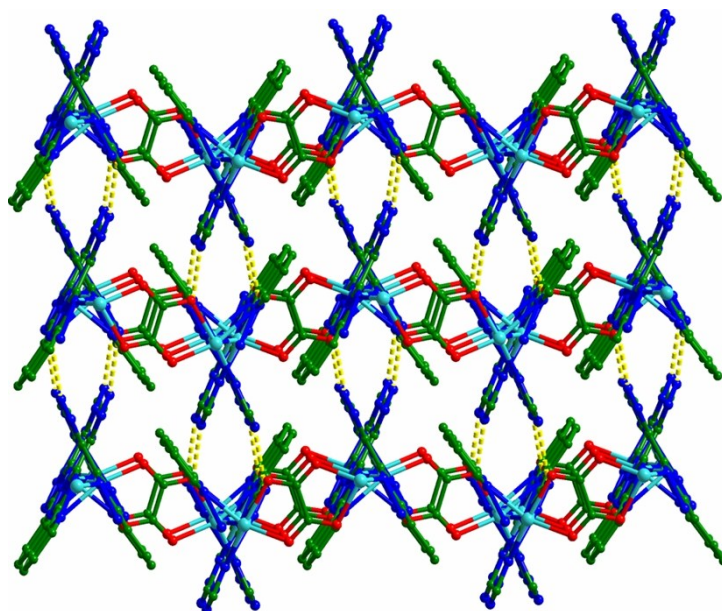

b

**Figure S2.** The three-dimensional supermolecular structure formed by  $\pi \cdots \pi$  (a) and hydrogen-bonding interactions (b).

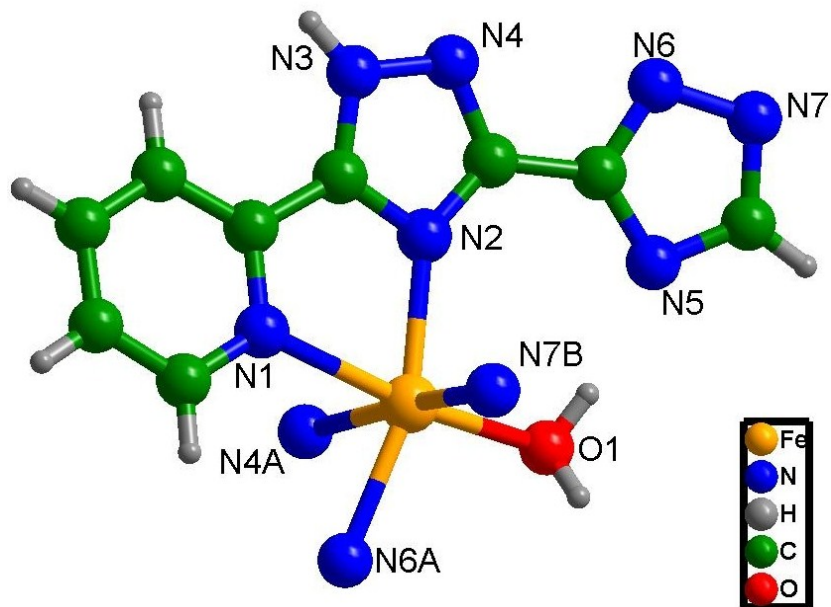

**Figure S3:** The coordination environment of  $\text{Fe}^{2+}$  in polymer 2.

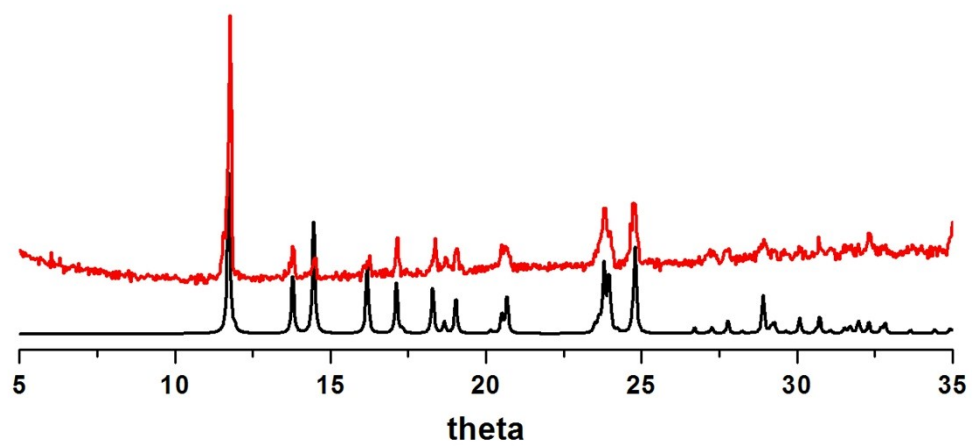

1

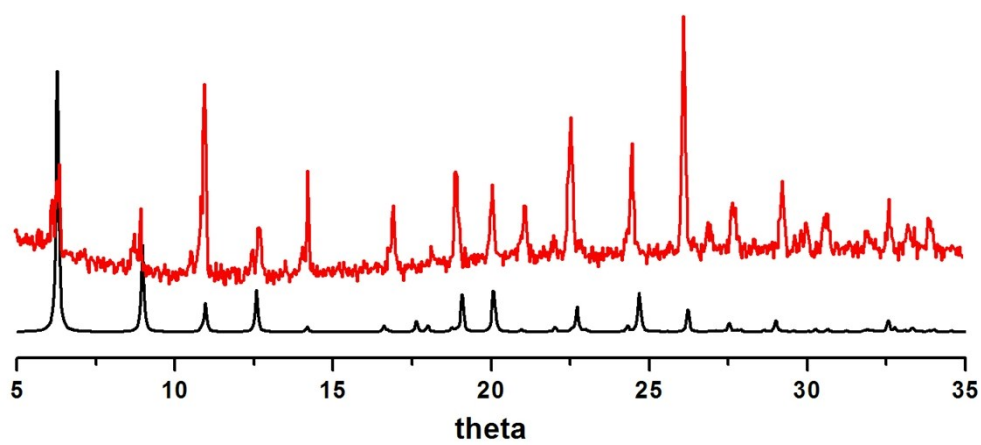

2

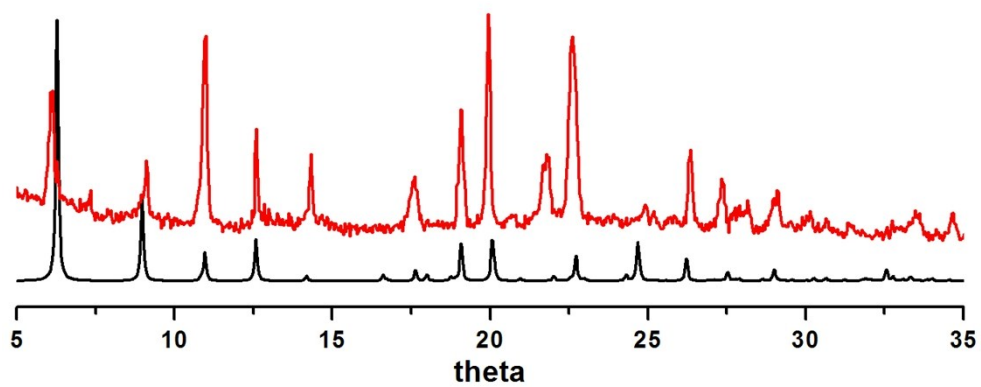

3

Figure S4. The PXR D patterns of polymers 1-3.

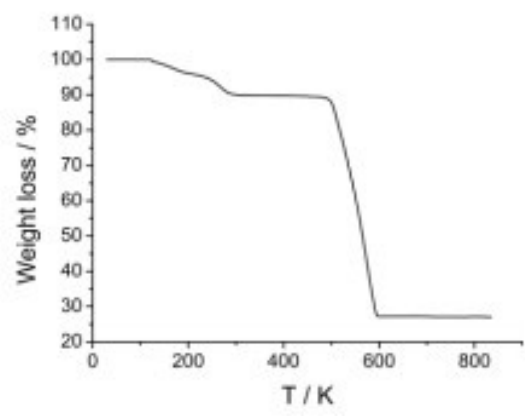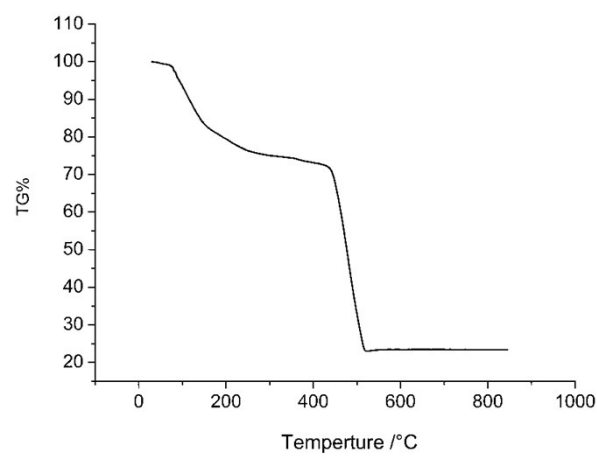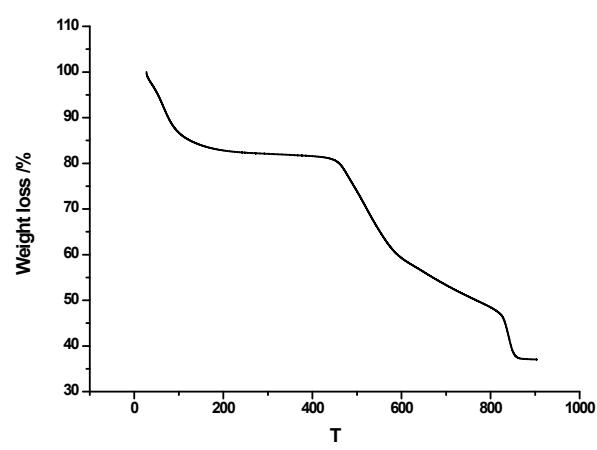

**Figure S5.** The TG curves of complexes 1-3.

**Table S1.** Selected bond lengths /Å and angles /° for **1-3**

| Complex 1           |            |                     |            |
|---------------------|------------|---------------------|------------|
| Fe(1)-O(2)#1        | 2.092(2)   | Fe(1)-N(3)#2        | 2.149(3)   |
| Fe(1)-N(2)          | 2.173(3)   | Fe(1)-O(1)          | 2.189(2)   |
| Fe(1)-N(5)#2        | 2.195(3)   | Fe(1)-N(1)          | 2.239(3)   |
| O(2)#1-Fe(1)-N(3)#2 | 95.44(10)  | O(2)#1-Fe(1)-N(2)   | 102.36(10) |
| N(3)#2-Fe(1)-N(2)   | 162.09(10) | O(2)#1-Fe(1)-O(1)   | 77.36(9)   |
| N(3)#2-Fe(1)-O(1)   | 92.79(10)  | N(2)-Fe(1)-O(1)     | 89.18(10)  |
| O(2)#1-Fe(1)-N(5)#2 | 100.83(9)  | N(3)#2-Fe(1)-N(5)#2 | 76.06(10)  |
| N(2)-Fe(1)-N(5)#2   | 102.22(10) | O(1)-Fe(1)-N(5)#2   | 168.55(10) |
| O(2)#1-Fe(1)-N(1)   | 160.88(9)  | N(3)#2-Fe(1)-N(1)   | 86.66(10)  |
| N(2)-Fe(1)-N(1)     | 75.87(9)   | O(1)-Fe(1)-N(1)     | 83.57(9)   |
| Complex 2           |            |                     |            |
| O(1)-Fe(1)-N(7)#1   | 93.12(14)  | Fe(1)-N(6)#2        | 2.171(3)   |
| O(1)-Fe(1)-N(2)     | 96.33(11)  | Fe(1)-N(4)#2        | 2.204(3)   |
| N(7)#1-Fe(1)-N(2)   | 91.11(12)  | Fe(1)-N(1)          | 2.285(3)   |
| O(1)-Fe(1)-N(6)#2   | 98.58(12)  | N(2)-Fe(1)-N(4)#2   | 94.84(12)  |
| N(7)#1-Fe(1)-N(6)#2 | 96.15(11)  | N(6)#2-Fe(1)-N(4)#2 | 76.37(11)  |
| N(2)-Fe(1)-N(6)#2   | 163.01(12) | O(1)-Fe(1)-N(1)     | 170.93(12) |
| O(1)-Fe(1)-N(4)#2   | 92.87(13)  | N(7)#1-Fe(1)-N(1)   | 90.13(14)  |
| N(7)#1-Fe(1)-N(4)#2 | 171.05(12) | N(2)-Fe(1)-N(1)     | 75.12(11)  |
| O(1)-Fe(1)-N(7)#1   | 93.12(14)  | N(6)#2-Fe(1)-N(1)   | 89.48(12)  |
| O(1)-Fe(1)-N(2)     | 96.33(11)  | N(4)#2-Fe(1)-N(1)   | 84.94(13)  |
| N(7)#1-Fe(1)-N(2)   | 91.11(12)  |                     |            |
| Complex 3           |            |                     |            |
| O(1)-Mn(1)-N(6)#1   | 92.85(15)  | Mn(1)-N(6)#1        | 2.212(4)   |
| O(1)-Mn(1)-N(4)#2   | 95.77(14)  | Mn(1)-N(5)          | 2.241(4)   |
| N(6)#1-Mn(1)-N(4)#2 | 91.42(15)  | Mn(1)-N(2)          | 2.311(4)   |
| O(1)-Mn(1)-N(5)     | 95.70(14)  | N(4)#2-Mn(1)-N(1)#2 | 74.28(15)  |
| N(6)#1-Mn(1)-N(5)   | 97.28(14)  | N(5)-Mn(1)-N(1)#2   | 93.44(15)  |
| N(4)#2-Mn(1)-N(5)   | 165.22(14) | O(1)-Mn(1)-N(2)     | 92.80(15)  |
| O(1)-Mn(1)-N(1)#2   | 169.08(15) | N(6)#1-Mn(1)-N(2)   | 169.70(15) |
| N(6)#1-Mn(1)-N(1)#2 | 91.91(16)  | N(4)#2-Mn(1)-N(2)   | 96.58(15)  |
| O(1)-Mn(1)-N(6)#1   | 92.85(15)  | N(5)-Mn(1)-N(2)     | 73.59(14)  |
| O(1)-Mn(1)-N(4)#2   | 95.77(14)  | N(1)#2-Mn(1)-N(2)   | 84.06(16)  |
| N(6)#1-Mn(1)-N(4)#2 | 91.42(15)  |                     |            |

Symmetry transformations used to generate equivalent atoms: for polymer **1**: #1 -x, -y+1, -z+1  
#2 x-1/2, -y+3/2, z-1/2; for polymer **2**: #1 -y+5/4, x+1/4, -z+1/4 #2 y-1/4, -x+3/4, z-1/4  
#3 -y+3/4, x+1/4, z+1/4 #4 y-1/4, -x+5/4, -z+1/4; for polymer **3**: #1 -x+1, -y+1, -z+2 #2  
y+1/4, -x+5/4, z+1/4 #3 -y+5/4, x-1/4, z-1/4
